# Supplementary material
Source: Springer Nature journal article supplement (https://www.springermedizin.de/resource/supplementary/13058_2011_2895_MOESM9_ESM.pdf/9702802)

**A**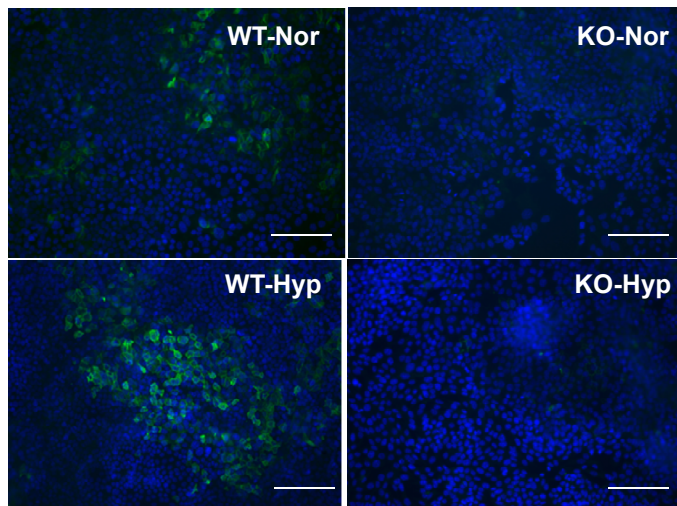**B**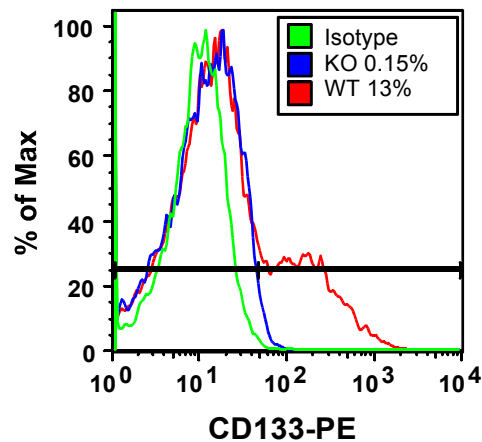**C**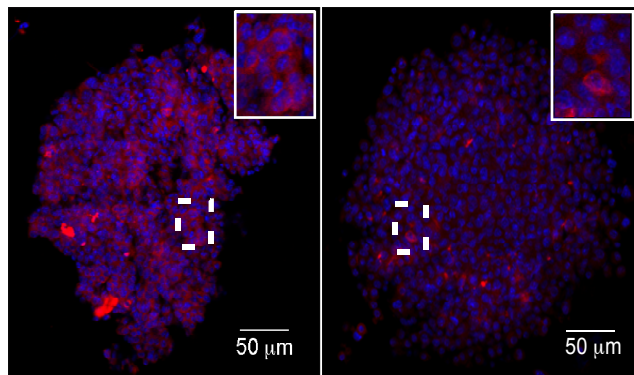**D**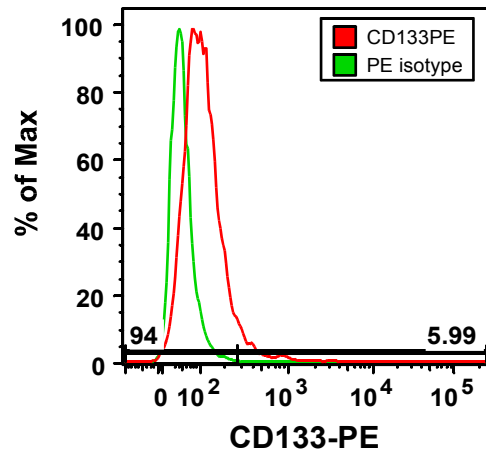**E**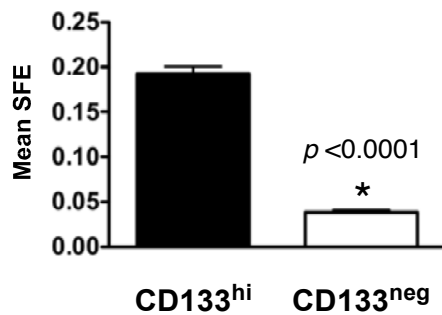

Supplement: MOESM9 [file 9702802]
